# Supplementary material for: Age-related brain atrophy is not a homogenous process: Different functional brain networks associate differentially with aging and blood factors
Source: PubMed Central journal article supplement (PMC9894212; doi:10.1073/pnas.2207181119), 2022-12-02
Supplement: pnas.2207181119.sapp.pdf [file pnas.2207181119.sapp.pdf]

## Supplementary Information for

Age related brain atrophy is not a homogenous process: different functional brain networks associate differentially with aging and blood factors

Nikola T. Markov<sup>1</sup>, Cutter A. Lindbergh<sup>2,7</sup>, Adam M. Staffaroni<sup>2</sup>, Kevin Perez<sup>1,3</sup>, Michael Stevens<sup>1</sup>, Khiem Nguyen<sup>1,6</sup>, Natalia F. Murad<sup>1</sup>, Corrina Fonseca<sup>2</sup>, Judith Campisi<sup>1</sup>, Joel Kramer<sup>2</sup> and David Furman<sup>1,4,5\*</sup>

<sup>1</sup>*Buck AI Platform, Buck Institute for Research on Aging, Novato, CA, USA*

<sup>2</sup>*University of California, San Francisco, Weill Institute for Neurosciences, Memory and Aging Center, Department of Neurology, San Francisco, CA, USA*

<sup>3</sup>*University of Lausanne, Lausanne, Switzerland*

<sup>4</sup>*Instituto de Investigaciones en Medicina Traslacional (IIMT), Universidad Austral, CONICET, Pilar, Argentina*

<sup>5</sup>*Stanford 1000 Immunomes Project, Stanford University School of Medicine, Stanford, CA, USA*

<sup>6</sup> *NTT Hi-Tech Institute, Nguyen Tat Thanh University, Ho Chi Minh City, Vietnam*

<sup>7</sup> *Department of Psychiatry, University of Connecticut School of Medicine, Farmington, CT, USA*

**\*Corresponding author:** David Furman

**Email:** DFurman@buckinstitute.org

### This PDF file includes:

Figures S1 to S6  
Table ST1

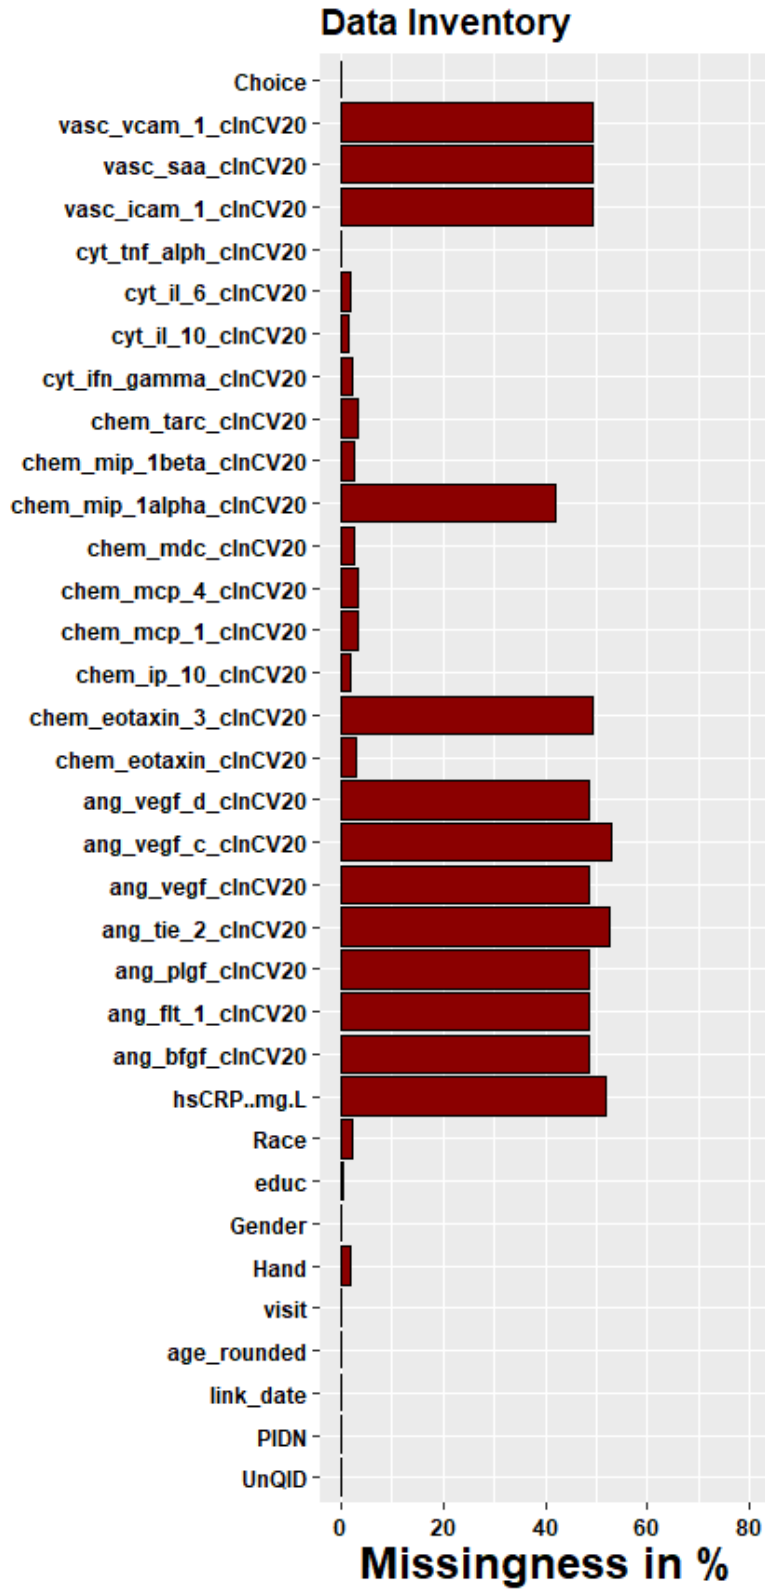

**Fig. S1.** Data inventory of 1288 visits with cytokine data collection.

**Ages for cases with Cytokines    Regularization weights for MIC**

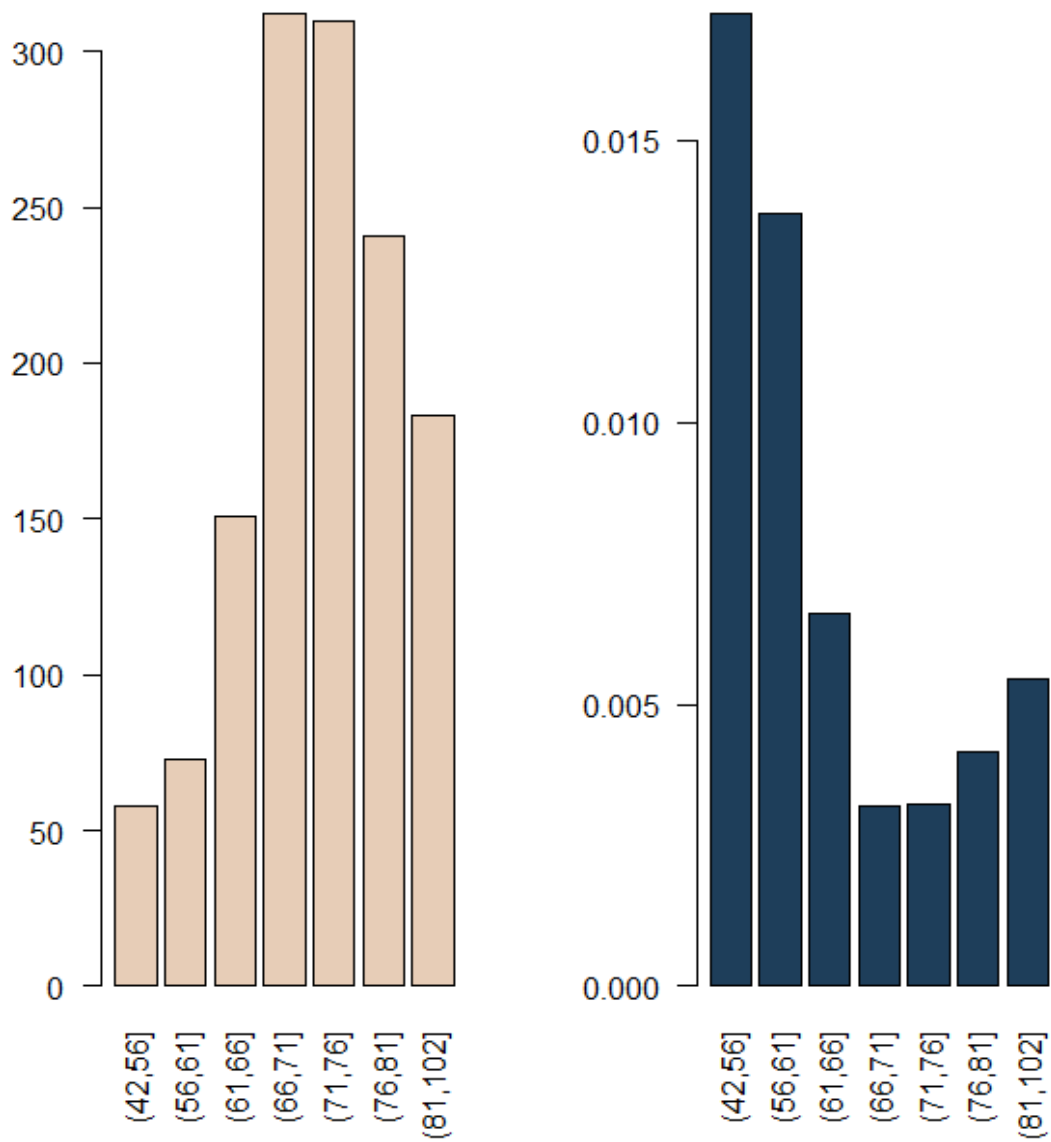

**Fig. S2.** Distribution of visitation ages and regularization weights based on this distribution.

### Predictors matrix

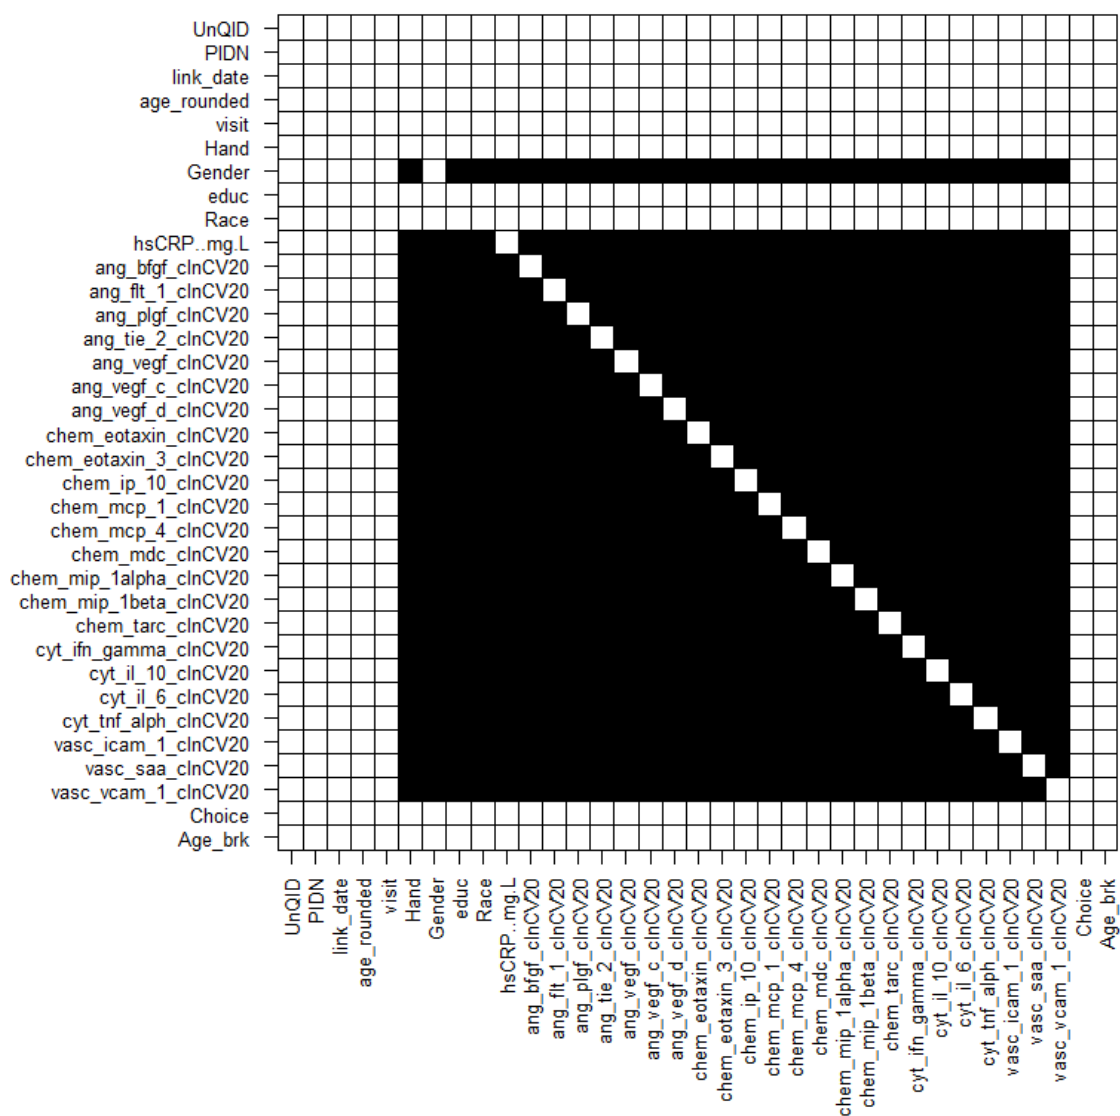

**Fig. S3.** Predictor matrix used in the generation of the 500 “data complete” circulating protein panels.

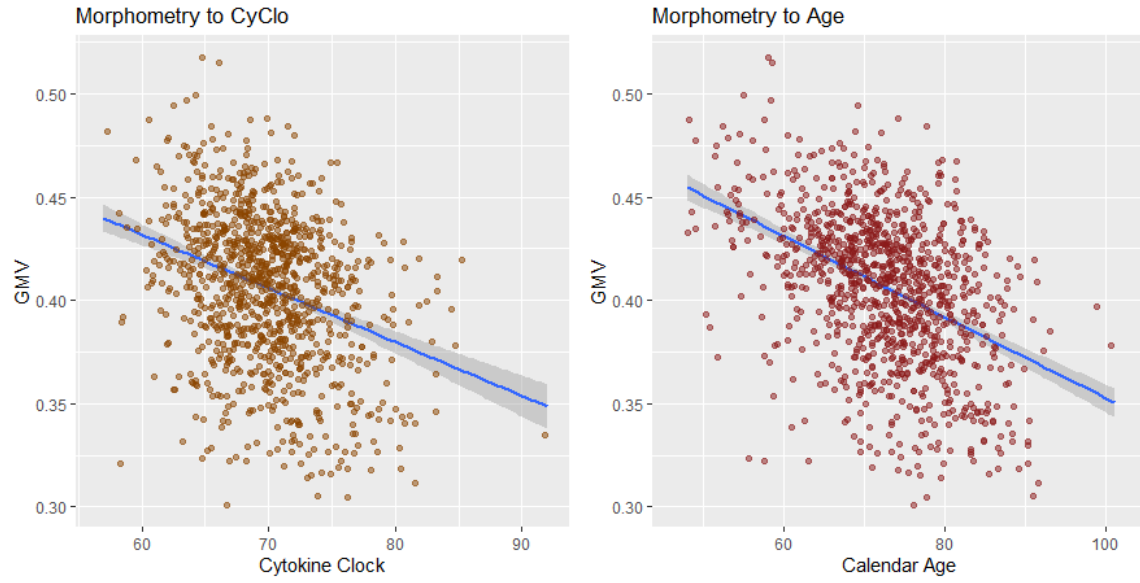

**Fig. S4.** Linear Regression of Gray Matter Volume (GMV) against the Cytokine Clock and Calendar Age.

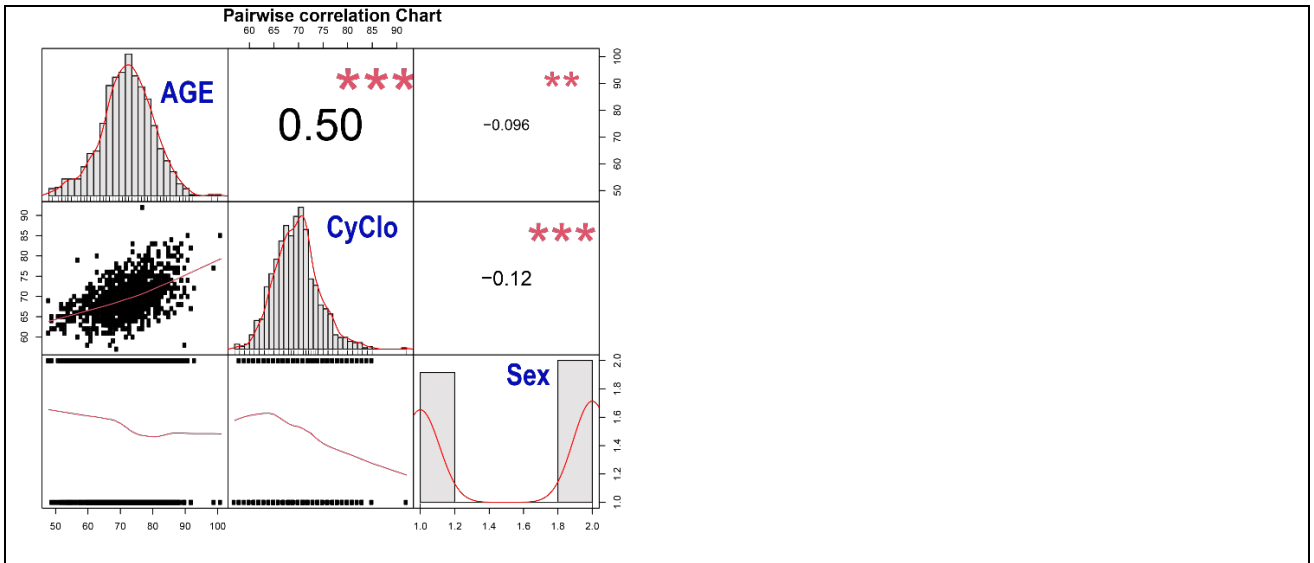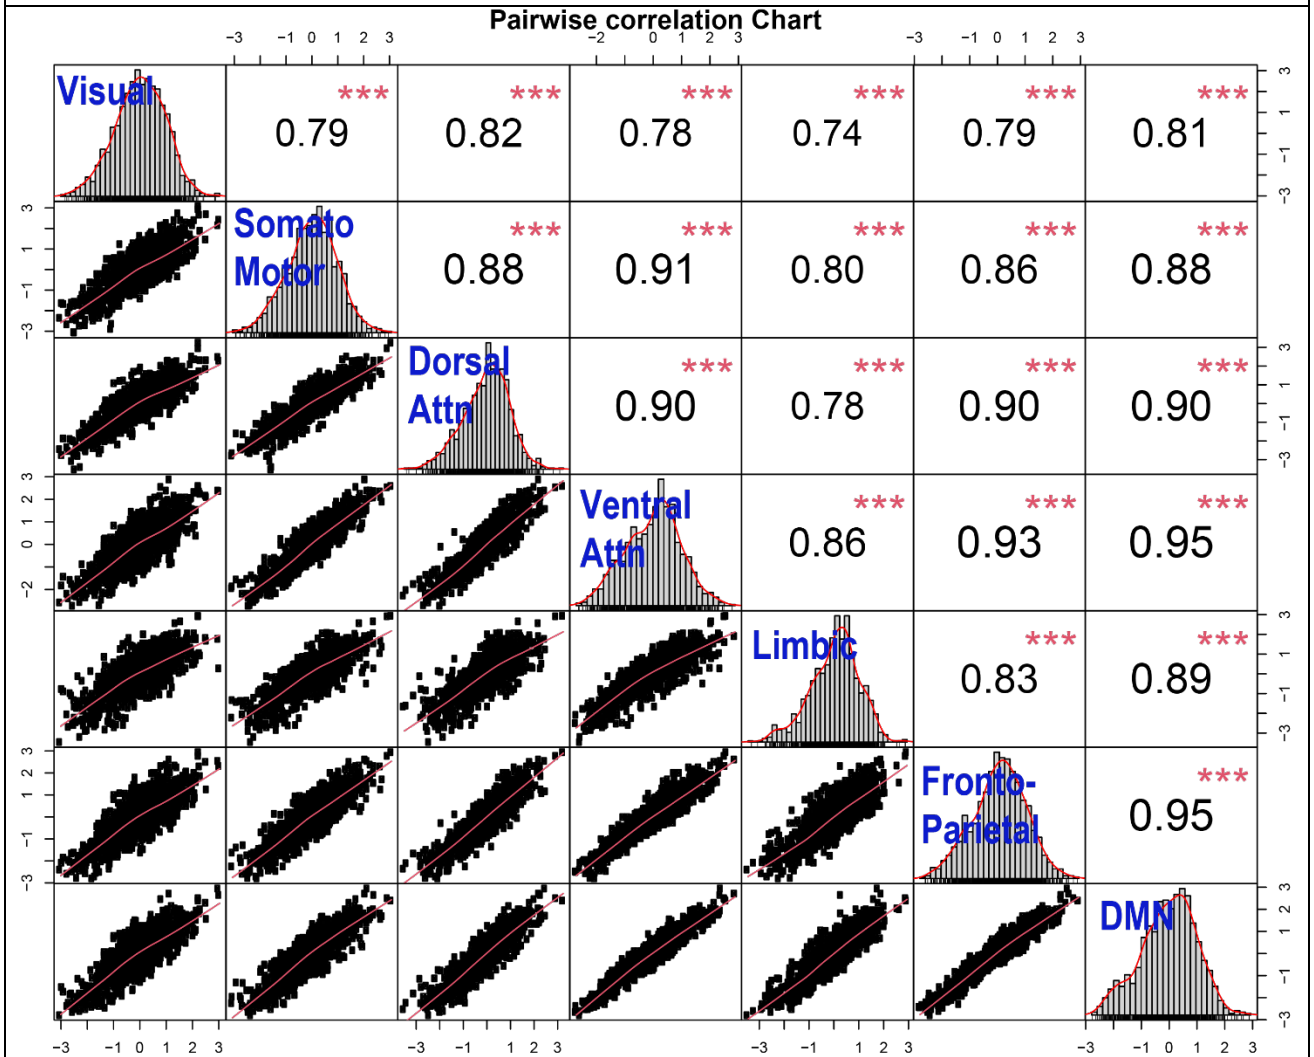

**Fig. S5.** Pair plots (lower triangle) and Paired correlation test (upper triangle), numbers give R and stars indicate significance of p-val.

### Interval between two consecutive visits

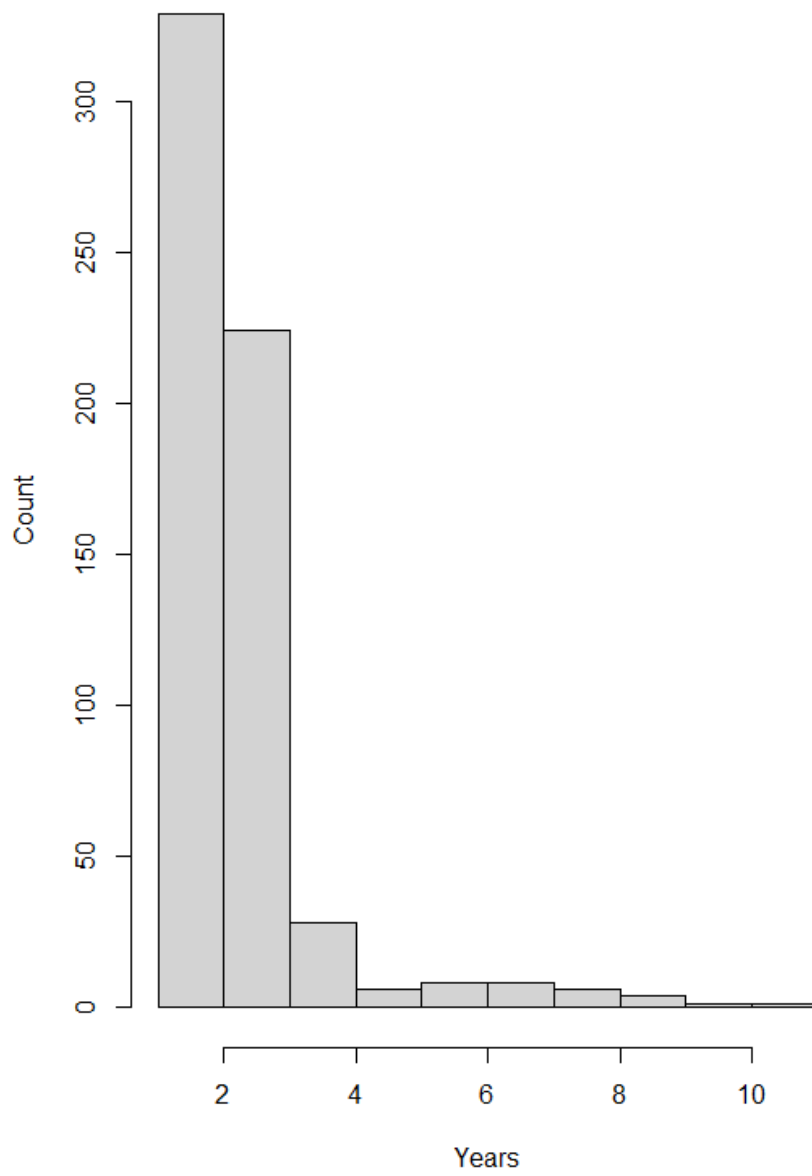

**Fig. S6.** Histogram plot of the interval between repeated visits for all patients.

| <b>Canonical correlation Analysis summary</b>                    |              |              |               |                  |                   |
|------------------------------------------------------------------|--------------|--------------|---------------|------------------|-------------------|
| <b>Canonical Correlations:</b>                                   |              |              |               |                  |                   |
| <b>CV1</b>                                                       | <b>CV2</b>   | <b>CV3</b>   |               |                  |                   |
| 0.59                                                             | 0.38         | 0.11         |               |                  |                   |
| <b>Shared variance on each Canonical Variate:</b>                |              |              |               |                  |                   |
| <b>CV1</b>                                                       | <b>CV2</b>   | <b>CV3</b>   |               |                  |                   |
| 0.35                                                             | 0.14         | 0.01         |               |                  |                   |
| <b>Bartlett's Chi-squared Test:</b>                              |              |              |               |                  |                   |
|                                                                  | <b>rho^2</b> | <b>Chisq</b> | <b>df</b>     | <b>Pr(&gt;X)</b> |                   |
| <b>CV1</b>                                                       | 0.35         | 617          | 21            | <0.001           | ***               |
| <b>CV2</b>                                                       | 0.14         | 170          | 12            | <0.001           | ***               |
| <b>CV3</b>                                                       | 0.01         | 11           | 5             | 0.038            | *                 |
| <b>Canonical Variate Coefficients:</b>                           |              |              |               |                  |                   |
| Y vars:                                                          | <b>CV1</b>   | <b>CV2</b>   | <b>CV3</b>    |                  |                   |
| <b>Age</b>                                                       | 0.7824       | 0.4742       | 0.7092        |                  |                   |
| <b>CyClo</b>                                                     | 0.1848       | 0.0014       | -1.1465       |                  |                   |
| <b>Sex</b>                                                       | -0.3688      | 0.9268       | -0.1494       |                  |                   |
| X vars:                                                          |              | <b>CV1</b>   | <b>CV2</b>    | <b>CV3</b>       |                   |
| <b>Visual</b>                                                    |              | -0.2685      | -1.2097       | 0.1765           |                   |
| <b>Somatosensory/Motor</b>                                       |              | -1.2561      | -0.8857       | -0.6888          |                   |
| <b>Dorsal Attention</b>                                          |              | 0.3336       | 1.0398        | -1.9818          |                   |
| <b>Ventral Attention</b>                                         |              | 0.2267       | 0.8406        | 0.6670           |                   |
| <b>Limbic</b>                                                    |              | 0.2448       | -0.3163       | 0.4093           |                   |
| <b>Fronto-Parietal</b>                                           |              | -0.0285      | 1.1108        | 0.4846           |                   |
| <b>DMN</b>                                                       |              | -0.2035      | -0.4356       | 1.0966           |                   |
| <b>Structural Correlations (Loadings):</b>                       |              |              |               |                  |                   |
| Y vars:                                                          | <b>CV1</b>   | <b>CV2</b>   | <b>CV3</b>    |                  |                   |
| <b>Age</b>                                                       | 0.9106       | 0.3861       | 0.1472        |                  |                   |
| <b>CyClo</b>                                                     | 0.6241       | 0.1239       | -0.7715       |                  |                   |
| <b>Sex</b>                                                       | -0.4668      | 0.8812       | -0.0742       |                  |                   |
| X vars:                                                          |              | <b>CV1</b>   | <b>CV2</b>    | <b>CV3</b>       |                   |
| <b>Visual</b>                                                    |              | -0.8188      | -0.1174       | 0.1013           |                   |
| <b>Somatosensory/Motor</b>                                       |              | -0.9749      | 0.1583        | 0.0145           |                   |
| <b>Dorsal Attention</b>                                          |              | -0.8100      | 0.3744        | -0.1024          |                   |
| <b>Ventral Attention</b>                                         |              | -0.8350      | 0.3744        | 0.2502           |                   |
| <b>Limbic</b>                                                    |              | -0.7106      | -0.1449       | 0.3815           |                   |
| <b>Fronto-Parietal</b>                                           |              | -0.8016      | 0.4324        | 0.2588           |                   |
| <b>DMN</b>                                                       |              | -0.8170      | 0.3221        | 0.3106           |                   |
| <b>F test for Canonical Correlations (Rao's F Approximation)</b> |              |              |               |                  |                   |
|                                                                  | <b>Corr</b>  | <b>F</b>     | <b>Num df</b> | <b>Den df</b>    | <b>Pr (&gt;F)</b> |
| <b>CV1</b>                                                       | 0.59         | 32.5         | 21            | 2995             | <0.001 ***        |
| <b>CV2</b>                                                       | 0.38         | 14.8         | 12            | 2088             | <0.001 ***        |
| <b>CV3</b>                                                       | 0.11         | 2.37         | 5             | 1045             | 0.038 *           |

**Table ST1. Summary results of the canonical correlation analysis**
